# Supplementary material
Source: publisher figshare collection journal article supplement (https://geolsoc.figshare.com/ndownloader/files/27339631)
Supplement: Supplementary file 1 [file 27339631]

## Sheet: Foglio1
SAMPLE	Step #	T (K)	DT	Dt	39Ar%	release	40Ar Total	Err.40Ar	40Ar*	Err.40Ar*	39Ar	Err.39Ar	%39Ar	38Ar	Err.38Ar	38ArCl	Err.38Cl	37Ar	Err.37Ar	36Ar	Err.36Ar	Age	1 s Err Age	Ca/K	Error Ca/K	Cl/K	Error Cl/K
UT15-5 Bt	1	931.629	200	16	17.3481	0.0867405	3.03505e-08	2.7971e-11	5.29268e-09	7.46643e-11	1.50921e-09	1.78766e-12	17.3481	4.97557e-11	8.06893e-14	1.71497e-11	7.30785e-14	4.62067e-11	2.17498e-13	8.39408e-11	2.3187e-13	6.12034	0.0866527	0.059397	0.000288303	0.00202268	8.94584e-06
J= 0.000969	2	944.702	13.0729	21	16.4032	1.25474	4.71696e-09	8.76226e-13	3.91567e-09	4.12807e-12	1.42701e-09	1.08754e-12	16.4032	3.08964e-11	5.07345e-14	1.45266e-11	5.68553e-14	3.05458e-11	2.05346e-13	2.69167e-12	1.35109e-14	4.79056	0.00630511	0.0415271	0.000280957	0.001812	7.22511e-06
m= 0.01605 g	3	956.165	11.4632	24	5.61404	0.489746	1.65096e-09	5.7294e-13	1.35223e-09	2.83005e-12	4.88399e-10	6.00021e-13	5.61404	1.08042e-11	2.10763e-14	5.18631e-12	6.61415e-14	9.75744e-12	1.85722e-13	1.00304e-12	9.28251e-15	4.8337	0.0117703	0.0387587	0.000739263	0.00189018	2.42173e-05
	4	969.409	13.2438	15	4.54481	0.343166	1.38095e-09	5.39242e-13	1.0945e-09	2.88703e-12	3.9538e-10	5.3953e-13	4.54481	8.78337e-12	1.93612e-14	4.20745e-12	7.45772e-14	7.24831e-12	1.84774e-13	9.61286e-13	9.4995e-15	4.83285	0.0143853	0.0355655	0.000907934	0.00189419	3.3674e-05
	5	1003.8	34.3915	20	5.66025	0.164583	1.79483e-09	5.39242e-13	1.36338e-09	3.01105e-12	4.92419e-10	6.01459e-13	5.66025	1.09263e-11	2.17458e-14	5.18022e-12	6.74686e-14	8.87152e-12	1.86076e-13	1.44739e-12	9.92203e-15	4.83374	0.0122376	0.0349519	0.00073434	0.00187255	2.44956e-05
	6	1044.77	40.9674	22	4.76418	0.116292	1.72173e-09	5.05545e-13	1.16814e-09	3.14242e-12	4.14465e-10	5.45768e-13	4.76418	9.34677e-12	1.89467e-14	4.38999e-12	6.86417e-14	7.65596e-12	1.85333e-13	1.85614e-12	1.0388e-14	4.92039	0.0147699	0.035836	0.000868789	0.00188537	2.95839e-05
	7	1085.2	40.4289	17	3.67163	0.0908171	1.57916e-09	5.05545e-13	9.5824e-10	3.36722e-12	3.19417e-10	5.47933e-13	3.67163	7.33062e-12	1.61006e-14	3.38766e-12	7.43269e-14	6.62513e-12	1.83411e-13	2.08142e-12	1.11503e-14	5.23685	0.0205046	0.0402387	0.00111611	0.00188782	4.15462e-05
	8	1147.17	61.9695	20	5.03313	0.0812195	2.68171e-09	7.07732e-13	1.66055e-09	4.28323e-12	4.37862e-10	4.97558e-13	5.03313	1.04904e-11	2.10799e-14	4.97535e-12	6.80232e-14	1.92228e-11	1.92962e-13	3.42516e-12	1.41488e-14	6.61776	0.0186999	0.0851713	0.000860429	0.00202259	2.77482e-05
	9	1205.96	58.7965	19	6.79946	0.115644	3.64006e-09	1.01102e-12	2.54688e-09	4.6727e-12	5.91526e-10	6.39382e-13	6.79946	1.47285e-11	2.63711e-14	7.45791e-12	6.08745e-14	2.938e-11	2.02811e-13	3.66899e-12	1.52795e-14	7.51145	0.0160655	0.0963595	0.000673279	0.00224421	1.84781e-05
	10	1420.64	214.679	23	26.498	0.123431	1.10983e-08	2.19051e-12	7.47743e-09	1.13673e-11	2.30522e-09	1.71126e-12	26.498	5.24962e-11	7.81705e-14	2.45833e-11	5.45265e-14	4.83271e-11	2.25343e-13	1.21402e-11	3.73596e-14	5.66166	0.00964501	0.0406711	0.000192033	0.00189822	4.43988e-06
	11	1625.41	204.772	10	3.66321	0.0178892	1.06017e-08	2.42641e-12	1.48075e-09	2.5273e-11	3.18684e-10	5.1682e-13	3.66321	1.29961e-11	2.44523e-14	3.67485e-12	6.56493e-14	7.66506e-11	2.57409e-13	3.05694e-11	8.42582e-14	8.10576	0.13898	0.466688	0.00174047	0.00205258	3.6819e-05
Conc (g/g)	K	Cl	Ca
	0.0799883	0.000155023	0.0051817
SAMPLE	Step #	T (K)	DT	Dt	39Ar%	release	40Ar Total	Err.40Ar	40Ar*	Err.40Ar*	39Ar	Err.39Ar	%39Ar	38Ar	Err.38Ar	38ArCl	Err.38Cl	37Ar	Err.37Ar	36Ar	Err.36Ar	Age	1 s Err Age	Ca/K	Error Ca/K	Cl/K	Error Cl/K
UT15-5 Bt+Ms	1	931.629	200	15	15.1286	0.0756428	3.56466e-08	6.74e-12	4.38922e-09	8.64513e-11	7.80707e-10	7.53335e-13	15.1286	4.02828e-11	6.54025e-14	1.1854e-11	7.76849e-14	5.44064e-11	2.42077e-13	1.04708e-10	2.8868e-13	9.79199	0.193107	0.135202	0.000615558	0.0027027	1.7903e-05
J= 0.000968	2	948.73	17.1011	17	14.7646	0.86337	4.66937e-09	6.06637e-13	2.14743e-09	8.73318e-12	7.61924e-10	6.7509e-13	14.7646	1.80782e-11	3.25333e-14	8.00729e-12	6.1411e-14	4.72574e-11	2.22213e-13	8.45907e-12	2.91797e-14	4.91546	0.0204828	0.120331	0.000575779	0.00187066	1.44422e-05
m= 0.01234 g	3	956.165	7.43503	18	7.08679	0.953162	1.60354e-09	1.31432e-12	1.02492e-09	4.09834e-12	3.65713e-10	4.73423e-13	7.08679	8.31957e-12	1.72078e-14	3.88446e-12	6.99685e-14	2.36671e-11	2.00462e-13	1.94407e-12	1.30016e-14	4.88775	0.0205667	0.125552	0.00107579	0.00189065	3.4143e-05
	4	969.409	13.2438	19	5.51094	0.416116	1.28642e-09	1.07842e-12	8.04443e-10	3.44175e-12	2.84391e-10	5.08919e-13	5.51094	6.45988e-12	1.47546e-14	2.99113e-12	7.72324e-14	1.70265e-11	1.95993e-13	1.61867e-12	1.0947e-14	4.93325	0.0228998	0.116153	0.0013531	0.00187214	4.84555e-05
	5	1003.8	34.3915	35	8.12454	0.236237	2.1387e-09	6.06637e-13	1.18784e-09	4.12996e-12	4.19266e-10	5.4971e-13	8.12454	9.67417e-12	1.92781e-14	4.40951e-12	6.75154e-14	2.15137e-11	1.9553e-13	3.19031e-12	1.36826e-14	4.94103	0.0183869	0.0995501	0.000914142	0.00187206	2.87687e-05
	6	1043.86	40.0616	18	3.46032	0.0863751	1.05956e-09	7.41431e-13	5.63642e-10	3.36557e-12	1.7857e-10	5.19199e-13	3.46032	4.176e-12	1.11846e-14	1.87639e-12	9.04895e-14	8.79771e-12	1.87791e-13	1.66328e-12	1.09956e-14	5.50399	0.036571	0.0955825	0.0020591	0.00187041	9.03647e-05
	7	1084.27	40.4053	20	3.70549	0.0917078	1.39083e-09	6.06637e-13	6.8404e-10	3.60486e-12	1.91221e-10	4.88708e-13	3.70549	4.62493e-12	1.15016e-14	2.05117e-12	8.40346e-14	1.03642e-11	1.88636e-13	2.36998e-12	1.19018e-14	6.2365	0.0365486	0.105152	0.00193262	0.00190935	7.83765e-05
	8	1146.2	61.936	19	4.18024	0.0674929	2.1411e-09	5.05545e-13	1.0897e-09	4.50221e-12	2.1572e-10	4.93327e-13	4.18024	5.67879e-12	1.54567e-14	2.61234e-12	9.19525e-14	2.11864e-11	1.96858e-13	3.527e-12	1.49841e-14	8.80063	0.0415971	0.190545	0.00182333	0.00215555	7.60338e-05
	9	1204.97	58.7693	20	5.37559	0.0914694	4.07224e-09	9.43624e-13	2.64155e-09	5.47107e-12	2.77407e-10	4.76044e-13	5.37559	9.08322e-12	1.76217e-14	5.08259e-12	6.57065e-14	5.6377e-11	2.29831e-13	4.80634e-12	1.80489e-14	16.5553	0.0446544	0.394317	0.00174416	0.00326128	4.2531e-05
	10	1313.06	108.092	20	15.1872	0.140502	6.66895e-09	1.41542e-12	4.98471e-09	6.61114e-12	7.83733e-10	7.79142e-13	15.1872	2.09502e-11	3.90812e-14	1.11548e-11	6.36608e-14	8.98307e-11	2.86478e-13	5.6641e-12	2.16271e-14	11.0739	0.0184888	0.222378	0.000742848	0.00253345	1.46763e-05
	11	1396.64	83.5712	27	11.0056	0.131691	5.86509e-09	1.78611e-12	1.95921e-09	1.19931e-11	5.67942e-10	6.33897e-13	11.0056	1.50909e-11	2.77203e-14	6.3066e-12	6.27991e-14	2.71963e-11	2.02287e-13	1.30893e-11	3.97218e-14	6.01448	0.0374434	0.0929013	0.000698739	0.00197657	1.98053e-05
	12	1628.57	231.936	10	6.47017	0.0278963	1.25558e-08	3.13411e-12	1.76898e-09	3.06143e-11	3.33892e-10	5.22421e-13	6.47017	1.43916e-11	2.73062e-14	3.84871e-12	6.70536e-14	7.8898e-11	2.6498e-13	3.61496e-11	1.02001e-13	9.23004	0.1604	0.45849	0.0016988	0.00205177	3.58906e-05
Conc (g/g)	K	Cl	Ca
	0.0617747	0.000136547	0.0106025
SAMPLE	Step #	T (K)	DT	Dt	39Ar%	release	40Ar Total	Err.40Ar	40Ar*	Err.40Ar*	39Ar	Err.39Ar	%39Ar	38Ar	Err.38Ar	38ArCl	Err.38Cl	37Ar	Err.37Ar	36Ar	Err.36Ar	Age	1 s Err Age	Ca/K	Error Ca/K	Cl/K	Error Cl/K
UT15-6 Bt	1	931.629	200	15	14.01	0.0700502	2.91218e-08	5.392e-12	4.80455e-09	7.27051e-11	1.06611e-09	9.81289e-13	14.01	4.34818e-11	7.59002e-14	1.62526e-11	7.54345e-14	1.00481e-10	3.11588e-13	8.14742e-11	2.42848e-13	7.89396	0.119687	0.182856	0.000591487	0.00271356	1.284e-05
J= 0.000973	2	944.702	13.0729	18	12.8994	0.986726	4.40939e-09	1.44912e-12	2.6859e-09	6.88208e-12	9.81596e-10	9.33983e-13	12.8994	2.42038e-11	4.3165e-14	1.21859e-11	6.12445e-14	8.69415e-11	2.86165e-13	5.79485e-12	2.25315e-14	4.79704	0.0131467	0.171839	0.000588763	0.00220975	1.13032e-05
m= 0.0162 g	3	956.165	11.4632	20	6.77367	0.590906	1.97978e-09	6.06637e-13	1.39323e-09	3.40518e-12	5.1545e-10	6.014e-13	6.77367	1.27333e-11	2.49888e-14	6.62406e-12	6.65463e-14	4.42298e-11	2.1472e-13	1.97587e-12	1.12215e-14	4.7387	0.0128689	0.166477	0.000831204	0.00228748	2.31349e-05
	4	969.409	13.2438	20	4.77816	0.360786	1.45495e-09	5.05545e-13	9.86312e-10	2.95575e-12	3.636e-10	5.40183e-13	4.77816	9.05393e-12	1.85506e-14	4.71058e-12	6.93641e-14	2.8157e-11	2.00641e-13	1.57684e-12	9.75341e-15	4.75564	0.0159353	0.150241	0.00109361	0.00230606	3.41295e-05
	5	1003.8	34.3915	19	4.8305	0.140456	1.50833e-09	5.05545e-13	9.97857e-10	3.21009e-12	3.67582e-10	5.41592e-13	4.8305	9.16478e-12	1.89279e-14	4.75134e-12	6.99199e-14	2.59411e-11	1.95079e-13	1.7164e-12	1.06171e-14	4.75915	0.0168665	0.136917	0.0010492	0.00230082	3.40277e-05
	6	1044.77	40.9674	20	4.70573	0.114865	1.55965e-09	5.7294e-13	9.72021e-10	3.32974e-12	3.58088e-10	5.08986e-13	4.70573	8.91361e-12	1.78859e-14	4.55774e-12	6.79182e-14	2.28756e-11	1.92515e-13	1.97406e-12	1.09859e-14	4.75882	0.0176751	0.123938	0.0010578	0.00226558	3.39143e-05
	7	1089.23	44.4631	19	4.27881	0.0962329	1.51836e-09	5.05545e-13	9.00752e-10	3.36349e-12	3.25601e-10	5.27339e-13	4.27881	8.13061e-12	1.70868e-14	4.11829e-12	7.11242e-14	1.71061e-11	1.86945e-13	2.07297e-12	1.11374e-14	4.84974	0.0197633	0.101925	0.00112606	0.00225139	3.90528e-05
	8	1146.97	57.7427	20	5.72409	0.099131	2.12187e-09	6.40335e-13	1.24613e-09	4.08795e-12	4.35581e-10	5.39691e-13	5.72409	1.07252e-11	2.00931e-14	5.32634e-12	6.35049e-14	2.27724e-11	1.92457e-13	2.93902e-12	1.35228e-14	5.01503	0.0176148	0.101428	0.000866362	0.00217661	2.6091e-05
	9	1205.96	58.9891	22	8.48665	0.143868	3.309e-09	9.09925e-13	2.06296e-09	4.99236e-12	6.45802e-10	6.88367e-13	8.48665	1.59013e-11	2.96938e-14	7.92615e-12	6.35255e-14	4.80553e-11	2.17721e-13	4.18578e-12	1.64402e-14	5.59895	0.014848	0.144366	0.000671929	0.00218466	1.76635e-05
	10	1313.89	107.932	20	19.0628	0.176619	6.02132e-09	1.31432e-12	4.25014e-09	7.2282e-12	1.45061e-09	1.24732e-12	19.0628	3.568e-11	5.96198e-14	1.84255e-11	5.83648e-14	6.90156e-11	2.54401e-13	5.95001e-12	2.38051e-14	5.13589	0.00984134	0.0923022	0.000349374	0.00226094	7.42096e-06
	11	1410.13	96.2394	20	11.0113	0.114416	4.423e-09	1.01102e-12	2.52571e-09	7.30233e-12	8.37916e-10	7.89355e-13	11.0113	2.10985e-11	3.54486e-14	1.05824e-11	5.75591e-14	2.93015e-11	1.99684e-13	6.36228e-12	2.42226e-14	5.28353	0.016101	0.0678424	0.000466729	0.00224804	1.24094e-05
	12	1637.68	227.547	10	3.43881	0.0151126	7.92451e-09	1.98831e-12	1.42993e-09	2.00828e-11	2.6168e-10	5.08363e-13	3.43881	1.03553e-11	2.14693e-14	3.32468e-12	7.12513e-14	8.20515e-11	2.69218e-13	2.17739e-11	6.69344e-14	9.56865	0.135682	0.608427	0.00232011	0.00226151	4.86653e-05
Conc (g/g)	K	Cl	Ca
	0.0690318	0.000159522	0.0101539
SAMPLE	Step #	T (K)	DT	Dt	39Ar%	release	40Ar Total	Err.40Ar	40Ar*	Err.40Ar*	39Ar	Err.39Ar	%39Ar	38Ar	Err.38Ar	38ArCl	Err.38Cl	37Ar	Err.37Ar	36Ar	Err.36Ar	Age	1 s Err Age	Ca/K	Error Ca/K	Cl/K	Error Cl/K
UT15-6 Bt+Ms	1	894.283	200	15	7.48537	0.0374269	2.10209e-08	5.729e-12	3.17147e-09	4.45885e-11	8.09284e-11	4.40796e-13	7.48537	1.42575e-11	2.50859e-14	2.07321e-12	6.57463e-14	4.80437e-11	2.33214e-13	5.97974e-11	1.48107e-13	67.4014	1.01638	1.15215	0.00840787	0.00455998	0.000146727
J= 0.000971	2	931.796	37.5131	20	11.2047	0.298687	1.06735e-08	2.46011e-12	4.14072e-10	2.59374e-11	1.2114e-10	4.44082e-13	11.2047	9.41602e-12	1.75891e-14	1.56461e-12	6.52387e-14	9.99168e-11	2.88288e-13	3.43886e-11	8.64825e-14	5.98114	0.375301	1.60101	0.00747148	0.002299	9.62305e-05
m= 0.00886 g	3	948.73	16.9342	17	6.28486	0.371135	1.11744e-09	5.05545e-13	2.12253e-10	3.85332e-12	6.7949e-11	4.73562e-13	6.28486	2.09065e-12	7.13536e-15	7.50626e-13	1.15178e-13	5.09542e-11	2.36038e-13	3.04485e-12	1.27932e-14	5.46645	0.106314	1.45552	0.0121847	0.00196635	0.000302032
	4	956.165	7.43503	19	4.85713	0.653277	9.64527e-10	5.05545e-13	1.63816e-10	3.50217e-12	5.25131e-11	4.7286e-13	4.85713	1.65953e-12	6.34894e-15	5.6192e-13	1.29066e-13	3.22134e-11	2.17376e-13	2.69012e-12	1.16066e-14	5.45863	0.12664	1.19055	0.0134002	0.0019047	0.000437823
	5	975.373	19.2082	20	4.29836	0.223778	9.44085e-10	7.41431e-13	1.59717e-10	3.45574e-12	4.64719e-11	4.39011e-13	4.29836	1.53436e-12	6.30372e-15	5.16579e-13	1.38565e-13	2.31276e-11	2.11735e-13	2.63307e-12	1.13047e-14	6.01252	0.141963	0.965801	0.0127074	0.00197864	0.000531071
	6	1003.8	28.4271	20	4.80821	0.169141	1.04382e-09	4.04456e-13	1.85835e-10	3.70279e-12	5.19841e-11	4.39232e-13	4.80821	1.6737e-12	7.95761e-15	5.49043e-13	1.60327e-13	1.98318e-11	2.10078e-13	2.87881e-12	1.23276e-14	6.25302	0.135343	0.740294	0.010032	0.00187999	0.00054921
	7	1043.5	39.6992	71	6.46293	0.162798	1.37468e-09	5.39242e-13	3.02785e-10	3.89887e-12	6.98743e-11	4.73663e-13	6.46293	2.20821e-12	8.47176e-15	7.50055e-13	1.29433e-13	1.84297e-11	2.10246e-13	3.5949e-12	1.29331e-14	7.57628	0.110265	0.511775	0.00679159	0.00191071	0.000329975
	8	1079.68	36.1766	17	17.1162	0.47313	4.76402e-09	1.51651e-12	7.11852e-10	1.12765e-11	1.85053e-10	4.51896e-13	17.1162	6.48594e-12	1.36975e-14	1.86218e-12	7.17163e-14	3.25411e-11	2.19611e-13	1.35807e-11	3.74263e-14	6.72681	0.107827	0.341184	0.00244869	0.00179121	6.91215e-05
	9	1141.34	61.6637	19	5.12926	0.0831812	1.66982e-09	5.7294e-13	2.89352e-10	4.59507e-12	5.54552e-11	4.39384e-13	5.12926	2.03515e-12	7.42799e-15	5.43148e-13	1.23142e-13	1.53179e-11	2.07775e-13	4.62768e-12	1.52705e-14	9.11887	0.161852	0.535969	0.0084198	0.0017434	0.000395503
	10	1204.58	63.2365	23	11.7791	0.186271	3.34363e-09	1.01102e-12	9.69362e-10	7.19721e-12	1.27351e-10	4.44703e-13	11.7791	4.25072e-12	1.0124e-14	1.32346e-12	8.05596e-14	4.88687e-11	2.32938e-13	7.96486e-12	2.38666e-14	13.2883	0.109066	0.744633	0.00440031	0.00184982	0.000112785
	11	1314.1	109.526	19	11.4065	0.104145	9.04694e-09	2.39271e-12	6.34146e-10	2.17033e-11	1.23322e-10	4.44296e-13	11.4065	8.02863e-12	1.62733e-14	1.33153e-12	6.98478e-14	5.2971e-11	2.39207e-13	2.81914e-11	7.22497e-14	8.98803	0.309316	0.833534	0.00481576	0.00192189	0.000101054
	12	1420.64	106.539	20	6.87832	0.0645613	4.8463e-09	1.31432e-12	6.25128e-10	1.17062e-11	7.43653e-11	4.40382e-13	6.87832	4.24099e-12	1.17118e-14	7.39464e-13	9.34984e-14	3.59603e-11	2.1926e-13	1.41476e-11	3.89607e-14	14.6706	0.288156	0.938416	0.00797754	0.00176997	0.000224043
	13	1579.44	158.802	24	1.78262	0.0112254	5.95462e-09	1.71871e-12	7.59034e-10	1.41981e-11	1.92729e-11	4.71956e-13	1.78262	3.65071e-12	1.01033e-14	1.45597e-13	9.38521e-14	3.73005e-11	2.24308e-13	1.74117e-11	4.72054e-14	67.7903	2.09071	3.75953	0.094915	0.0013447	0.000867423
	14	1630.3	50.8553	10	0.506316	0.00995602	8.53239e-09	2.19051e-12	5.23502e-10	2.05454e-11	5.47406e-12	4.38142e-13	0.506316	5.10663e-12	1.38181e-14	-1.88788e-14	9.22416e-14	2.60099e-11	2.16789e-13	2.68317e-11	6.84227e-14	160.688	14.3613	9.24731	0.746506	-0.000613882	-0.00299983
Conc (g/g)	K	Cl	Ca
	0.0179649	3.75536e-05	0.0174611
SAMPLE	Step #	T (K)	DT	Dt	39Ar%	release	40Ar Total	Err.40Ar	40Ar*	Err.40Ar*	39Ar	Err.39Ar	%39Ar	38Ar	Err.38Ar	38ArCl	Err.38Cl	37Ar	Err.37Ar	36Ar	Err.36Ar	Age	1 s Err Age	Ca/K	Error Ca/K	Cl/K	Error Cl/K
UT15-10 Ms2	1	868.76	200	15	2.05537	0.0102769	3.38016e-08	8.762e-12	1.50115e-08	8.08656e-11	1.57353e-10	4.67718e-13	2.05537	1.8603e-11	4.57679e-14	4.98735e-12	9.73747e-14	2.94005e-12	9.52277e-14	6.29363e-11	2.69257e-13	162.346	0.999373	0.0362484	0.00117901	0.00564177	0.000111421
J= 0.000987	2	905.788	37.0281	18	2.77173	0.0748549	2.242e-08	6.066e-12	1.126e-09	9.11165e-11	2.12195e-10	5.52008e-13	2.77173	1.72434e-11	4.16783e-14	1.43686e-12	9.98678e-14	3.72456e-12	9.56924e-14	7.13234e-11	3.04509e-13	9.42421	0.763011	0.0340524	0.000879356	0.00120532	8.3833e-05
m= 0.03252 g	3	939.47	33.6818	20	4.19786	0.124633	4.63268e-09	1.01102e-12	1.41087e-09	1.45539e-11	3.21374e-10	5.80637e-13	4.19786	6.45033e-12	1.83247e-14	8.4435e-13	9.64183e-14	1.83665e-12	9.47737e-14	1.07916e-11	4.86293e-14	7.8003	0.0817042	0.0110871	0.000572462	0.000467661	5.34101e-05
	4	952.754	13.2846	20	3.64003	0.274003	3.05165e-09	9.09925e-13	1.20722e-09	8.69031e-12	2.78668e-10	6.13396e-13	3.64003	4.66122e-12	1.45356e-14	3.99819e-13	1.05479e-13	1.03791e-12	9.42665e-14	6.17804e-12	2.89474e-14	7.69741	0.0579638	0.0072256	0.000656448	0.000255385	6.73772e-05
	5	964.24	11.4861	24	3.42362	0.298067	3.10092e-09	9.09925e-13	1.08771e-09	9.55578e-12	2.62101e-10	6.35228e-13	3.42362	4.48575e-12	1.37226e-14	3.0191e-13	1.03538e-13	7.9751e-13	9.41107e-14	6.74326e-12	3.18608e-14	7.37447	0.0672226	0.00590297	0.000696731	0.000205036	7.03177e-05
	6	977.526	13.2853	19	3.33743	0.251212	3.07008e-09	9.09925e-13	1.10379e-09	9.37918e-12	2.55502e-10	6.02002e-13	3.33743	4.31507e-12	1.4049e-14	2.34205e-13	1.10106e-13	6.54919e-13	9.40667e-14	6.58608e-12	3.12665e-14	7.67607	0.0677042	0.00497273	0.000714335	0.000163163	7.67085e-05
	7	1012.03	34.5016	20	8.15663	0.236413	6.08301e-09	1.78611e-12	3.08503e-09	1.36334e-11	6.24444e-10	8.51893e-13	8.15663	9.36595e-12	2.46043e-14	5.34154e-13	8.9503e-14	7.84972e-13	9.40351e-14	1.00417e-11	4.52704e-14	8.77569	0.0406256	0.00243872	0.000292164	0.000152263	2.5514e-05
	8	1051.83	39.8012	20	15.0165	0.377288	8.51078e-09	2.25791e-12	5.28681e-09	1.49423e-11	1.14961e-09	1.35838e-12	15.0165	1.53675e-11	3.80432e-14	5.57705e-13	8.5454e-14	9.52291e-13	9.43792e-14	1.07986e-11	4.94731e-14	8.17016	0.0250816	0.00160701	0.000159279	8.6352e-05	1.32316e-05
	9	1088.11	36.2817	17	13.4413	0.37047	7.79621e-09	4.04401e-12	4.62335e-09	1.49215e-11	1.02902e-09	1.31604e-12	13.4413	1.37792e-11	3.4992e-14	3.41676e-13	8.74412e-14	8.16906e-13	9.43952e-14	1.06274e-11	4.81079e-14	7.98258	0.0277582	0.0015401	0.000177973	5.91031e-05	1.51258e-05
	10	1154.38	66.2659	29	9.90527	0.149478	6.33518e-09	1.81981e-12	3.64008e-09	1.24961e-11	7.58314e-10	9.84969e-13	9.90527	1.04442e-11	2.81002e-14	3.15955e-13	9.17408e-14	1.76794e-12	9.49354e-14	9.02745e-12	4.14084e-14	8.52722	0.0313451	0.00452295	0.000242945	7.41644e-05	2.15347e-05
	11	1213.26	58.8859	20	6.47754	0.110002	7.65199e-09	2.39271e-12	2.74142e-09	2.17011e-11	4.95899e-10	7.75784e-13	6.47754	9.20042e-12	2.36338e-14	5.87336e-13	8.81069e-14	7.27493e-12	9.86075e-14	1.64494e-11	7.22429e-14	9.81694	0.0792386	0.0284604	0.000388326	0.000210821	3.16272e-05
	12	1321.5	108.239	19	5.18909	0.0479413	6.66063e-09	1.92091e-12	2.09017e-09	2.02129e-11	3.9726e-10	7.09399e-13	5.18909	7.63703e-12	2.02639e-14	3.357e-13	9.07022e-14	3.58135e-12	9.58407e-14	1.53093e-11	6.73947e-14	9.34452	0.0919124	0.0174895	0.000469078	0.000150417	4.06418e-05
	13	1591.48	269.98	20	20.9942	0.0777622	2.68795e-08	5.729e-12	8.53476e-09	7.8984e-11	1.60725e-09	1.841e-12	20.9942	3.00333e-11	7.00105e-14	5.87612e-13	9.5475e-14	8.13366e-12	1.01009e-13	6.1446e-11	2.63853e-13	9.43076	0.0879622	0.00981763	0.000122439	6.50771e-05	1.0574e-05
	14	1660.38	68.9013	10	1.39339	0.0202229	2.41265e-08	6.74e-12	2.39281e-09	9.33611e-11	1.06673e-10	4.51426e-13	1.39339	1.49613e-11	3.64914e-14	4.96447e-14	1.01206e-13	3.38343e-12	9.57682e-14	7.27959e-11	3.11889e-13	39.5068	1.55051	0.0615338	0.00176108	8.28397e-05	0.000168878
Conc (g/g)	K	Cl	Ca
	0.0341075	9.13114e-06	0.000325734
SAMPLE	Step #	T (K)	DT	Dt	39Ar%	release	40Ar Total	Err.40Ar	40Ar*	Err.40Ar*	39Ar	Err.39Ar	%39Ar	38Ar	Err.38Ar	38ArCl	Err.38Cl	37Ar	Err.37Ar	36Ar	Err.36Ar	Age	1 s Err Age	Ca/K	Error Ca/K	Cl/K	Error Cl/K
UT15-10 Ms3	1	869.237	200	15	2.18473	0.0109236	9.45983e-09	6.066e-12	7.43372e-10	3.42203e-11	1.00814e-10	4.81669e-13	2.18473	2.20574e-11	4.69844e-14	1.54264e-11	7.50828e-14	2.35878e-11	1.22019e-13	2.9201e-11	1.12802e-13	13.1239	0.607396	0.45398	0.00319707	0.0272373	0.000185781
J= 0.000990	2	906.117	36.88	17	3.17255	0.0860236	2.09738e-08	5.729e-12	7.25102e-10	7.73361e-11	1.46397e-10	5.24315e-13	3.17255	1.53351e-11	3.43163e-14	9.16371e-13	8.99855e-14	1.69447e-11	1.08889e-13	6.78254e-11	2.58319e-13	8.82528	0.941798	0.224562	0.00165209	0.00111419	0.000109484
m= 0.00916 g	3	939.807	33.6905	20	4.62646	0.137322	5.48663e-09	1.34802e-12	9.30253e-10	1.80503e-11	2.13487e-10	5.12984e-13	4.62646	5.94653e-12	1.61664e-14	6.96031e-13	9.25174e-14	3.51168e-12	9.58887e-14	1.52621e-11	6.0289e-14	7.76586	0.151845	0.0319117	0.000874738	0.000580333	7.71513e-05
	4	956.775	16.9672	21	3.81416	0.224796	2.20247e-09	6.74034e-13	7.23873e-10	6.70698e-12	1.76004e-10	5.32261e-13	3.81416	3.17623e-12	1.11533e-14	2.86437e-13	1.18578e-13	1.58653e-12	9.45702e-14	4.95282e-12	2.23507e-14	7.33079	0.0714642	0.0174876	0.00104375	0.000289686	0.000119926
	5	964.24	7.46571	21	3.21467	0.430592	1.95197e-09	6.40335e-13	5.86735e-10	6.41561e-12	1.48341e-10	4.92362e-13	3.21467	2.68084e-12	1.00367e-14	1.70123e-13	1.26366e-13	1.11554e-12	9.42884e-14	4.57303e-12	2.13812e-14	7.05059	0.0805801	0.0145891	0.00123406	0.000204138	0.000151633
	6	983.678	19.4376	73	3.44484	0.177226	2.06596e-09	8.08828e-13	6.68508e-10	6.41614e-12	1.58961e-10	4.63224e-13	3.44484	2.7915e-12	9.8296e-15	1.4246e-13	1.18859e-13	1.0396e-12	9.43188e-14	4.68089e-12	2.13188e-14	7.49557	0.0751981	0.0126876	0.00115169	0.000159523	0.000133096
	7	1007.92	24.238	19	15.6213	0.644496	8.64006e-09	2.49381e-12	3.00848e-09	2.23599e-11	7.20842e-10	8.65069e-13	15.6213	1.21673e-11	2.85434e-14	6.00711e-13	8.09356e-14	2.60838e-12	9.50711e-14	1.88632e-11	7.44252e-14	7.43879	0.0560231	0.00701993	0.000256004	0.000148336	1.99865e-05
	8	1051.83	43.9126	19	5.80328	0.132155	2.72317e-09	8.42527e-13	1.14483e-09	6.98552e-12	2.67791e-10	5.64915e-13	5.80328	4.19723e-12	1.19998e-14	2.24774e-13	9.6676e-14	8.89579e-13	9.43452e-14	5.28672e-12	2.32266e-14	7.61936	0.0492155	0.00644453	0.000683616	0.000149407	6.42611e-05
	9	1092.51	40.6796	19	8.16686	0.200761	3.54969e-09	1.11212e-12	1.58858e-09	8.60854e-12	3.76858e-10	5.89899e-13	8.16686	5.67977e-12	1.55446e-14	2.5363e-13	9.26489e-14	1.22321e-12	9.43112e-14	6.56888e-12	2.85919e-14	7.51309	0.0424046	0.00629688	0.000485599	0.000119796	4.37609e-05
	10	1154.38	61.8681	26	10.1791	0.16453	5.38146e-09	1.44912e-12	2.05374e-09	1.34007e-11	4.69714e-10	6.4585e-13	10.1791	7.68509e-12	1.83282e-14	3.63681e-13	8.1167e-14	3.06404e-12	9.53606e-14	1.11467e-11	4.46214e-14	7.79231	0.0519851	0.0126551	0.000394242	0.000137818	3.07591e-05
	11	1213.46	59.0856	17	10.2077	0.172762	9.77364e-09	2.86451e-12	2.04768e-09	2.9955e-11	4.71033e-10	6.71716e-13	10.2077	1.04958e-11	2.39449e-14	3.81365e-13	7.95485e-14	5.94972e-12	9.72935e-14	2.58789e-11	9.98718e-14	7.74769	0.113887	0.0245048	0.000402238	0.000144115	3.00615e-05
	12	1321.5	108.039	60	5.83555	0.0540135	4.5601e-09	1.34802e-12	1.14019e-09	1.3867e-11	2.69281e-10	5.65538e-13	5.83555	5.31777e-12	1.45249e-14	1.65106e-13	9.26986e-14	3.34026e-12	9.5434e-14	1.14555e-11	4.62262e-14	7.5467	0.0931536	0.0240647	0.000689404	0.000109139	6.12761e-05
	13	1591.48	269.98	21	22.0145	0.0815411	1.4741e-08	3.70701e-12	4.37022e-09	4.04373e-11	1.01585e-09	1.11199e-12	22.0145	1.81744e-11	4.07175e-14	3.34071e-13	8.07351e-14	1.36994e-11	1.06575e-13	3.47396e-11	1.34871e-13	7.66732	0.0714562	0.0261623	0.000205535	5.85368e-05	1.41467e-05
	14	1661.52	70.0433	10	1.71428	0.0244745	1.65343e-08	4.38101e-12	4.53134e-10	6.13885e-11	7.9105e-11	5.11428e-13	1.71428	1.09436e-11	2.62481e-14	-9.16987e-14	8.98051e-14	2.11919e-12	9.49747e-14	5.3863e-11	2.05091e-13	10.2022	1.38372	0.0519726	0.00235335	-0.000206338	-0.000202082
Conc (g/g)	K	Cl	Ca
	0.0727651	5.57713e-05	0.00246815
SAMPLE	Step #	T (K)	DT	Dt	39Ar%	release	40Ar Total	Err.40Ar	40Ar*	Err.40Ar*	39Ar	Err.39Ar	%39Ar	38Ar	Err.38Ar	38ArCl	Err.38Cl	37Ar	Err.37Ar	36Ar	Err.36Ar	Age	1 s Err Age	Ca/K	Error Ca/K	Cl/K	Error Cl/K
UT15-10 Ms+Chl	1	869.078	200	15	2.26925	0.0113462	4.79441e-09	1.17952e-12	4.4238e-10	1.50236e-11	2.60195e-11	4.71833e-13	2.26925	4.9096e-12	1.25489e-14	1.87141e-12	8.68324e-14	2.43683e-12	1.20212e-13	1.45774e-11	5.01648e-14	29.9643	1.15363	0.1817	0.00955003	0.0128024	0.000637783
J= 0.000985	2	905.952	36.8745	17	3.4409	0.0933138	1.80587e-08	4.718e-12	5.40553e-10	5.65446e-11	3.94538e-11	5.06e-13	3.4409	1.23227e-11	2.38282e-14	8.20471e-13	7.44866e-14	2.28686e-12	1.20431e-13	5.8676e-11	1.88731e-13	24.1849	2.54881	0.112453	0.00609511	0.00370164	0.000339392
m= 0.00287 g	3	939.639	33.6862	20	4.23698	0.125778	3.31098e-09	6.74034e-13	3.9918e-10	1.01896e-11	4.85817e-11	4.39406e-13	4.23698	2.88725e-12	9.33903e-15	5.08257e-13	1.09317e-13	1.12358e-12	1.19663e-13	9.75311e-12	3.40543e-14	14.5426	0.393844	0.0448682	0.00479574	0.00186222	0.000400882
	4	952.754	13.1157	20	3.23213	0.246432	9.09292e-10	5.7294e-13	2.36008e-10	3.58032e-12	3.706e-11	4.05135e-13	3.23213	1.02738e-12	6.10276e-15	1.90323e-13	2.00251e-13	3.08352e-13	1.19342e-13	2.25519e-12	1.18374e-14	11.2812	0.210958	0.0161416	0.00624979	0.000914127	0.000961862
	5	960.205	7.4504	19	2.72151	0.365283	7.71117e-10	4.71848e-13	2.01271e-10	3.25594e-12	3.12051e-11	4.38423e-13	2.72151	8.60241e-13	5.46241e-15	1.53571e-13	2.14062e-13	2.69694e-13	1.19397e-13	1.90872e-12	1.07903e-14	11.4254	0.244817	0.0167668	0.00742658	0.000876	0.00122111
	6	979.614	19.4094	21	3.01124	0.155143	7.9672e-10	5.05545e-13	1.96817e-10	3.43749e-12	3.45272e-11	4.72172e-13	3.01124	8.85849e-13	5.75515e-15	1.23292e-13	2.19022e-13	2.43237e-13	1.1944e-13	2.00939e-12	1.13883e-14	10.1013	0.22408	0.0136669	0.00671367	0.000635613	0.00112917
	7	1012.03	32.4132	20	5.14575	0.158755	1.01938e-09	5.05545e-13	2.80016e-10	3.82166e-12	5.90017e-11	4.06749e-13	5.14575	1.25859e-12	6.20954e-15	1.36007e-13	1.66353e-13	2.85153e-13	1.19369e-13	2.47652e-12	1.26878e-14	8.41392	0.128662	0.00937597	0.00392544	0.000410314	0.000501871
	8	1047.67	35.6389	20	12.1304	0.340371	1.54572e-09	5.39242e-13	6.27908e-10	4.37743e-12	1.39089e-10	4.51265e-13	12.1304	2.33708e-12	8.04717e-15	2.11937e-13	1.16191e-13	3.1514e-13	1.19329e-13	3.07422e-12	1.45501e-14	8.00444	0.0615705	0.00439554	0.00166445	0.000271227	0.000148699
	9	1088.11	40.444	21	14.4841	0.358128	1.7733e-09	5.7294e-13	7.34444e-10	4.52535e-12	1.66077e-10	4.56904e-13	14.4841	2.73816e-12	9.22666e-15	2.36704e-13	1.1372e-13	3.43739e-13	1.19384e-13	3.47966e-12	1.50352e-14	7.84148	0.0529368	0.00401535	0.00139461	0.000253698	0.000121886
	10	1149.91	61.7958	63	13.8418	0.223993	2.03918e-09	7.07732e-13	7.16898e-10	5.3817e-12	1.58712e-10	4.87719e-13	13.8418	2.82e-12	8.99351e-15	2.21328e-13	1.07681e-13	5.56691e-13	1.19446e-13	4.429e-12	1.7869e-14	8.00895	0.0649847	0.00680467	0.00146019	0.000248226	0.00012077
	11	1208.92	59.0158	21	10.6368	0.180237	5.08521e-09	1.24692e-12	5.99182e-10	1.51495e-11	1.21963e-10	4.48174e-13	10.6368	4.5379e-12	1.16404e-14	3.49274e-13	8.71293e-14	1.58754e-12	1.1996e-13	1.50259e-11	5.05699e-14	8.70919	0.222521	0.0252524	0.00191042	0.000509752	0.000127176
	12	1321.29	112.37	19	4.28625	0.0381442	2.19857e-09	6.74034e-13	2.45811e-10	7.25985e-12	4.91466e-11	4.39445e-13	4.28625	1.86269e-12	7.13955e-15	8.3203e-14	1.29353e-13	7.09731e-13	1.19512e-13	6.54077e-12	2.42112e-14	8.86616	0.273599	0.028016	0.00472427	0.000301346	0.000468502
	13	1432.39	111.096	17	8.18288	0.0736558	3.06588e-09	7.75129e-13	3.85754e-10	9.49935e-12	9.38258e-11	4.43941e-13	8.18288	2.77542e-12	8.66943e-15	4.01145e-14	1.05566e-13	7.91837e-13	1.19648e-13	8.97705e-12	3.17111e-14	7.29127	0.182841	0.0163726	0.00247514	7.61026e-05	0.000200273
	14	1582.19	149.806	23	11.9814	0.0799794	1.51149e-08	4.38101e-12	5.57623e-10	4.70112e-11	1.3738e-10	4.83675e-13	11.9814	1.07769e-11	2.18852e-14	5.65727e-14	7.47646e-14	1.84911e-12	1.20002e-13	4.87586e-11	1.56775e-13	7.19854	0.607414	0.0261122	0.0016971	7.32996e-05	9.68708e-05
	15	1683.58	101.383	10	0.39848	0.00393043	7.19732e-09	1.95461e-12	5.53218e-11	2.34465e-11	4.56901e-12	4.04095e-13	0.39848	4.52263e-12	1.16256e-14	-3.86842e-14	8.80031e-14	5.84811e-13	1.19447e-13	2.39216e-11	7.82586e-14	21.3907	9.26115	0.248332	0.0552731	-0.00150706	-0.00343103
Conc (g/g)	K	Cl	Ca
	0.0580004	4.46941e-05	0.00134368
